# Supplementary material for: Distinct and Dynamic Changes in the Temporal Profiles of Neurotransmitters in <em>D. melanogaster</em> Brain following Volatilized Cocaine or Methamphetamine Administrations
Source: Preprints.org preprint supplement (doi:10.20944/preprints202309.2013.v1), 2023-09-29
Supplement: Supplementary file 2 [file supplementary]

## Supplementary material

**Table S1.** MS/MS standards optimization parameters. The table lists, for each standard, the recording mode (polarity), precursor ion ( $m/z$ ), fragmentor, fragment ions ( $m/z$ ), collision energy (CE), retention time ( $t_R$ ), slope (a) and section on the x-axis (b),  $R^2$ , linearity range (linearity), detection limit (LOD), and quantification limit (LOQ).

| Standard  | Polarity | Precursor<br>( $m/z$ ) | Fragmentor<br>(V) | Product ions<br>( $m/z$ ) | CE<br>(V) | $t_R$<br>(min) | Y=ax + b      |               | $R^2$  | Linearity range<br>( $\mu\text{g/mL}$ ) | LOD<br>( $\mu\text{g/mL}$ ) | LOQ<br>( $\mu\text{g/mL}$ ) |
|-----------|----------|------------------------|-------------------|---------------------------|-----------|----------------|---------------|---------------|--------|-----------------------------------------|-----------------------------|-----------------------------|
|           |          |                        |                   |                           |           |                | Slope<br>(a)  | Intercept (b) |        |                                         |                             |                             |
| Dopamin   | +        | 153.9                  | 60                | 118.6                     | 10        | 1.0            | 37355.512266  | -49.952304    | 0.9947 | 0.01-1                                  | 0.00441                     | 0.01337                     |
|           |          |                        |                   | <u>90.9</u>               | 20        |                |               |               |        |                                         |                             |                             |
| Octopamin | +        | 153.9                  | 60                | 136.9                     | 4         | 0.5            | 109396.977405 | 10.295928     | 0.9992 | 0.0001-1                                | 0.000311                    | 0.000941                    |
|           |          |                        |                   | <u>90.8</u>               | 24        |                |               |               |        |                                         |                             |                             |
|           |          |                        |                   | <u>120.9</u>              | 4         |                |               |               |        |                                         |                             |                             |
| Tyramin   | +        | 137.9                  | 60                | 90.9                      | 22        | 1.5            | 167336.717374 | 79.131000     | 0.9975 | 0.001-1                                 | 0.001561                    | 0.004729                    |
|           |          |                        |                   | <u>77.0</u>               | 30        |                |               |               |        |                                         |                             |                             |

\*Quantifier ions are underlined.

**Table S2.** MS/MS parameters for components semiquantified without standards: acetylcholine (ACh), gamma-aminobutyric acid (GABA) and glutamate, N-acetyl dopamine, N-acetyl tyramine, cocaine (COC) and methamphetamine (METH). The table list the recording mode (polarity), precursor ion ( $m/z$ ), fragmentor, fragment ions ( $m/z$ ), collision energy (CE), and retention time ( $t_R$ ).

| Compound          | Polarity | Precursor ( $m/z$ ) | Fragmentor (V) | Product ions ( $m/z$ ) | CE (V) | $t_R$ (min) |
|-------------------|----------|---------------------|----------------|------------------------|--------|-------------|
| ACh               | +        | 147.0               | 135            | <u>88.0</u>            | 25     | 0.6         |
|                   |          |                     |                | 87.0                   | 25     |             |
| GABA              | +        | 103.9               | 135            | 69.0                   | 5      | 0.6         |
|                   |          |                     |                | <u>45.0</u>            | 25     |             |
|                   |          |                     |                | 43.0                   | 25     |             |
| Glutamate         | +        | 147.9               | 135            | 129.0                  | 25     | 0.7         |
|                   |          |                     |                | 101.0                  | 25     |             |
|                   |          |                     |                | <u>84.0</u>            | 25     |             |
| N-acetyl dopamine | +        | 196.0               | 135            | 154.0                  | 15     | 4.6         |
|                   |          |                     |                | 137.0                  | 15     |             |
|                   |          |                     |                | 119.0                  | 30     |             |
|                   |          |                     |                | 91.0                   | 30     |             |
| METH              | +        | 150.5               | 135            | <u>91.2</u>            | 20     | 5.2         |
| N-acetyl tyramine | +        | 180.0               | 135            | 138.0                  | 30     | 5.3         |
|                   |          |                     |                | 121.0                  | 30     |             |
|                   |          |                     |                | 91.0                   | 40     |             |
|                   |          |                     |                | <u>77.0</u>            | 40     |             |

|     |   |       |     |              |    |     |
|-----|---|-------|-----|--------------|----|-----|
| COC | + | 304.1 | 100 | <u>182.1</u> | 30 | 7.2 |
|-----|---|-------|-----|--------------|----|-----|

---

\*Quantifier ions are underlined.
