# Supplementary material for: Distinct and Dynamic Changes in the Temporal Profiles of Neurotransmitters in <em>D. melanogaster</em> Brain following Volatilized Cocaine or Methamphetamine Administrations
Source: Preprints.org preprint supplement (doi:10.20944/preprints202309.2013.v1), 2023-09-29
Supplement: Supplementary file 3 [file supplementary]

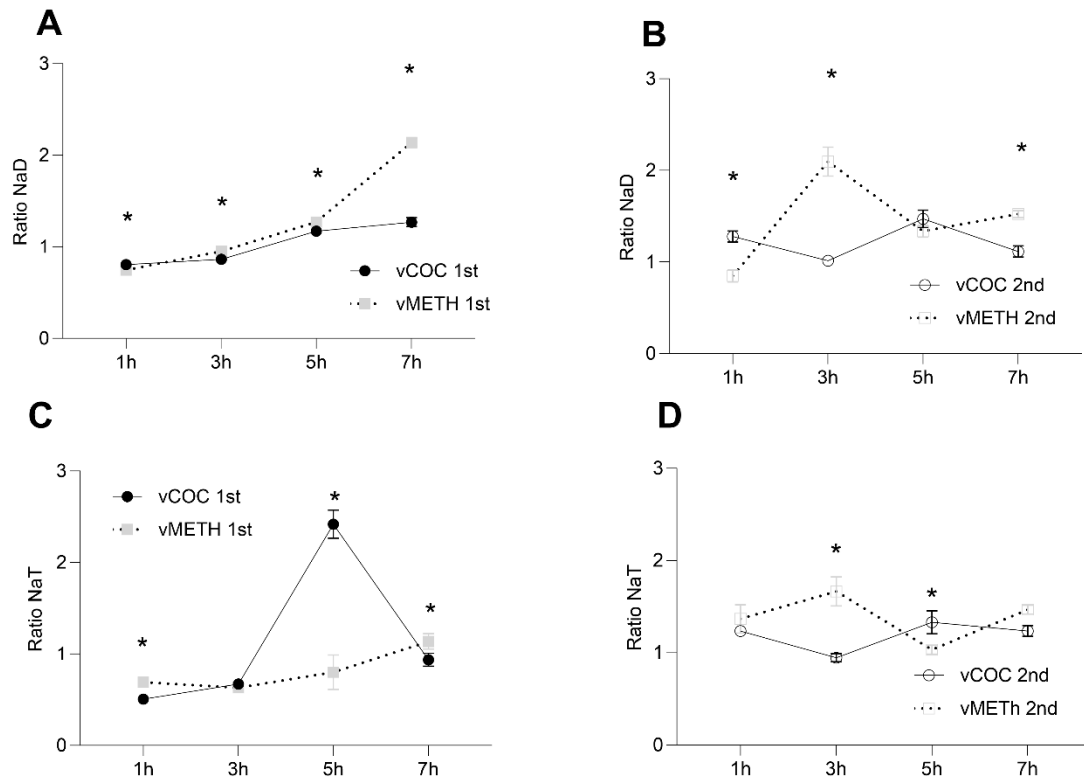

**Figure S2.** Temporal dynamics of changes in the concentration ratio of DA metabolite N-acetyl dopamine and TA metabolite N-acetyl tyramine semi-quantified without standards after vCOC and vMETH administration. Presentation of changes in the concentration of N-acetyl dopamine (NaD) **A**) and N-acetyl tyramine (NaT) **C**) after exposure to one (vCOC 1st) and (vMETH 1st) dose. Two-way ANOVA with Tukey's multiple comparisons test. \*:  $p < 0.05$ . Presentation of changes in the concentration of N-acetyl dopamine (NaD) **B**) and N-acetyl tyramine (NaT) **D**) after exposure to two (vCOC 2nd) and two (vMETH 2nd) doses. Two-way ANOVA with Tukey's multiple comparisons test. \*:  $p < 0.05$ .
