# Supplementary material for: Distinct and Dynamic Changes in the Temporal Profiles of Neurotransmitters in <em>D. melanogaster</em> Brain following Volatilized Cocaine or Methamphetamine Administrations
Source: Preprints.org preprint supplement (doi:10.20944/preprints202309.2013.v1), 2023-09-29
Supplement: Supplementary file 5 [file supplementary]

Archive with 4 entries (4 files):
- pharmaceuticals-2653669-supplementary/Figure S1.pdf
- pharmaceuticals-2653669-supplementary/Figure S2.pdf
- pharmaceuticals-2653669-supplementary/Figure S3.pdf
- pharmaceuticals-2653669-supplementary/Table S1,S2.pdf
